# Supplementary material
Source: PubMed Central journal article supplement (PMC2745675)
Supplement: neo1110_1093SD1.pdf [file neo1110_1093SD1.pdf]

**Table W1.** List of Antibodies.

| Antibody          | Supplier                           |
|-------------------|------------------------------------|
| $\alpha_6\beta_4$ | Clone B5.5 [1]                     |
| Actin             | BD, Heidelberg, G.                 |
| Annexin V         | Santa Cruz, Heidelberg, G.         |
| $\beta$ -Catenin  | BD, Heidelberg, G.                 |
| bFGF              | Oncogene, Boston, MA               |
| C3                | MP Biomed., Eschwege, G.           |
| C4.4A             | Clone C4.4 [1]                     |
| Caveolin          | BD, Heidelberg, G.                 |
| CD44s             | Clone Ox50 (EAACC)                 |
| CD44v6            | Clone A2.6 [1]                     |
| CD104             | BD, Heidelberg, G.                 |
| CD106             | Biozol, Eching, G.                 |
| CD11a             | BD, Heidelberg, G.                 |
| CD11b             | Clone Ox42 (EAACC)                 |
| CD11c             | Clone Ox41 (EAACC)                 |
| CD13              | [2]                                |
| CD133             | Abcam, Cambridge, UK               |
| CD151             | [3]                                |
| CD18              | BD, Heidelberg, G.                 |
| CD24              | Santa Cruz, Heidelberg, G.         |
| CD29              | BD, Heidelberg, G.                 |
| CD31              | BD, Heidelberg, G.                 |
| CD49a             | BD, Heidelberg, G.                 |
| CD49b             | BD, Heidelberg, G.                 |
| CD49c             | BD, Heidelberg, G.                 |
| CD49d             | BD, Heidelberg, G.                 |
| CD49e             | BD, Heidelberg, G.                 |
| CD49f             | Abcam, Cambridge, UK               |
| CD53              | BD, Heidelberg, G.                 |
| CD54              | Biozol, Eching, G.                 |
| CD61              | Biozol, Eching, G.                 |
| CD81              | Santa Cruz, Heidelberg, G.         |
| CD9               | BD, Heidelberg, G.                 |
| Claudin-7         | [4]                                |
| c-Met             | New England Biolabs, Frankfurt, G. |
| Collagen I        | Rockland, Gilbertsville, PA        |
| Collagen II       | LabVision, Fremont, CA             |
| Collagen III      | ARB, Golden, CO                    |
| Collagen IV       | Rockland, Gilbertsville, PA        |
| D6.1A             | Clone D6.1 [1]                     |
| EpCAM             | Clone D5.7 [1]                     |
| EWI-F             | [5]                                |
| EGFR              | Santa Cruz, Heidelberg, G.         |
| FN                | BD, Heidelberg, G.                 |
| Galectin          | Santa Cruz, Heidelberg, G.         |
| HAS3              | Abcam, Cambridge, UK               |
| HSP-1             | Santa Cruz, Heidelberg, G.         |
| Hyaluronan        | Rockland, Gilbertsville, PA        |
| INS-2             | Santa Cruz, Heidelberg, G.         |
| Laminin 1         | Rockland, Gilbertsville, PA        |
| Laminin 5         | BD, Heidelberg, G.                 |
| MMP13             | Dianova, Hamburg, G.               |
| MMP2              | Dianova, Hamburg, G.               |
| MMP9              | Dianova, Hamburg, G.               |
| Osteopontin       | Santa Cruz, Heidelberg, G.         |
| PDGF              | BD, Heidelberg, G.                 |
| PDGFR             | BD, Heidelberg, G.                 |
| PGK-1             | Santa Cruz, Heidelberg, G.         |
| S100A4            | Abcam, Cambridge, UK               |
| SDF-1             | Abcam, Cambridge, UK               |
| Tenascin          | LabVision, Fremont, CA             |
| TGF $\beta$       | Santa Cruz, Heidelberg, G.         |
| Thrombospondin    | Santa Cruz, Heidelberg, G.         |
| TNF $\alpha$      | BD, Heidelberg, G.                 |
| uPA               | Calbiochem, Darmstadt, G.          |
| uPAR              | Calbiochem, Darmstadt, G.          |
| VEGF              | Biotrend, Köln, G.                 |
| VEGFR1            | Biotrend, Köln, G.                 |
| VEGFR2            | Biotrend, Köln, G.                 |
| VN                | Biotrend, Köln, G.                 |
| vWF               | Abcam, Cambridge, UK               |

CD44s indicates CD44 standard isoform; EAACC, European Association of Animal Cell Cultures, Porton Down, UK; G., Germany.

## References

- [1] Matzku S, Wenzel A, Liu S, and Zöller M (1989). Antigenic differences between metastatic and nonmetastatic rat tumor variants characterized by monoclonal antibodies. *Cancer Res* **49**, 1294–1299.
- [2] Chang YW, Chen SC, Cheng EC, Ko YP, Lin YC, Kao YR, Tsay YG, Yang PC, Wu CW, and Roffler SR (2005). CD13 (aminopeptidase N) can associate with tumor-associated antigen L6 and enhance the motility of human lung cancer cells. *Int J Cancer* **116**, 243–252.
- [3] Claas C, Wahl J, Orlicky D, Karaduman H, Schnölzer M, Kempf T, and Zöller M (2005). The tetraspanin D6.1A and its molecular partners on rat carcinoma cells. *Biochem J* **389**, 99–110.
- [4] Langbein L, Pape UF, Grund C, Kuhn C, Prätzel S, Moll I, Moll R, and Franke WW (2003). Tight junction-related structures in the absence of a lumen: occludin, claudins and tight junction plaque proteins in densely packed cell formations of stratified epithelia and squamous cell carcinomas. *Eur J Cell Biol* **82**, 385–400.
- [5] Orlicky DJ, Lieber JG, Morin CL, and Evans RM (1998). Synthesis and accumulation of a receptor regulatory protein associated with lipid droplet accumulation in 3T3-L1 cells. *J Lipid Res* **39**, 1152–1161.

**Table W2.** List of Primers.

| The following primers were used |           |                             |
|---------------------------------|-----------|-----------------------------|
| CD133                           | Sense     | 5'-AGCCAAGACACCTTCAATGC-3'  |
|                                 | Antisense | 5'-ACGGTGTGAGTTCCTGTC-3'    |
| CD166                           | Sense     | 5'-AACCTGGAGAGTCAGAGCA-3'   |
|                                 | Antisense | 5'-TGCGAGCTGTGATTTGTTTC     |
| CD24                            | Sense     | 5'-ACATCGGTTGCACCAATTTTC-3' |
|                                 | Antisense | 5'-GAGAGAGAGGCCAGGAGAC-3'   |
| GADPH                           | Sense     | 5'-GACCCCTTCATTGACCTCAAC-3' |
|                                 | Antisense | 5'-CTTCTCCATGGTGGTGAAGAC-3' |

Amplification was performed for 30 cycles starting with 1  $\mu$ g of complementary DNA. Annealing temperatures have been as follows: CD133, 57°C; CD24 and CD166, 60°C; and GAPDH, 55°C. Polymerase chain reaction products were separated by electrophoresis in a 1.5% agarose gel.

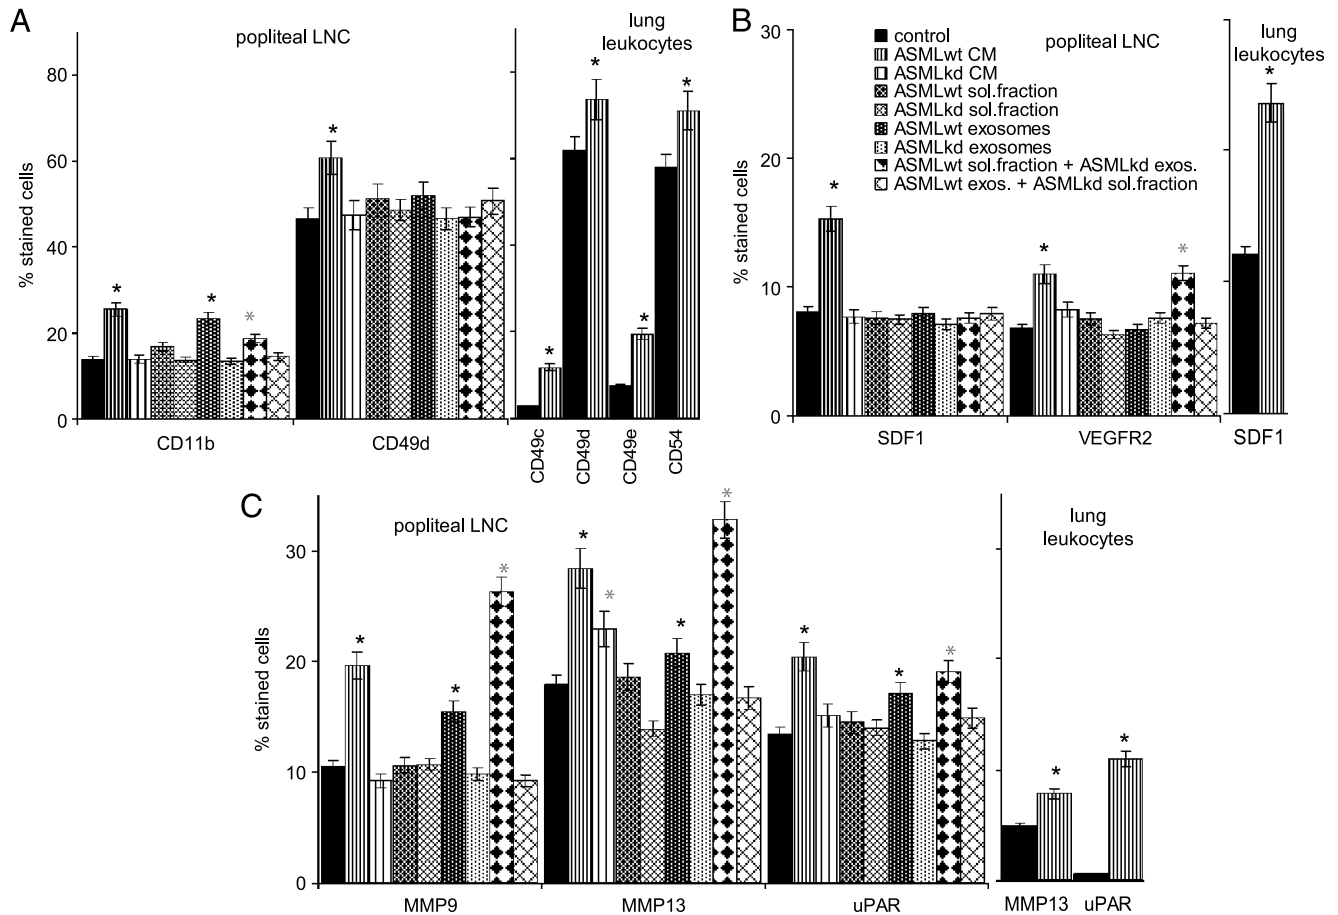

**Figure W1.** The impact of ASML<sup>wt</sup>-CM on gene expression in target cells. BDX rats received ASML<sup>wt</sup>- or ASML<sup>kd</sup>-CM or fractions thereof and thereafter ASML<sup>kd</sup> cells as described in Figure 1. LN and lung leukocytes were isolated. Expression of (A) integrins, (B) chemokines, chemokine receptors, and (C) matrix degrading enzymes was evaluated by flow cytometry. The percentage of stained cells (mean  $\pm$  SD of three experiments) is shown. Significant differences between control medium *versus* CM and fractions thereof are indicated by  $\star$ ; significant differences between ASML<sup>wt</sup>- *versus* ASML<sup>kd</sup>-CM and fractions thereof are indicated by  $\star$ .

**Table W3.** ASML<sup>wt</sup> Versus ASML<sup>kd</sup> Cells: Protein Expression and Recovery in the Soluble Matrix and in Exosomes.

| Marker                         | Cells    | Soluble Fraction | Exosomes |
|--------------------------------|----------|------------------|----------|
|                                | wt/kd    | wt/kd            | wt/kd    |
| <b>Metastasis markers</b>      |          |                  |          |
| CD44                           | +/+      | nt/nt            | nt/nt    |
| CD44v6                         | +++/-    | +++/-            | -/-      |
| EpCAM                          | +++/>+++ | -/-              | +++/>+++ |
| CD133                          | ±/±      | nt/nt            | nt/nt    |
| CD166                          | ±/±      | nt/nt            | nt/nt    |
| C4.4A                          | +++/>+++ | -/-              | +++/>+++ |
| α <sub>6</sub> β <sub>4</sub>  | +++/>+++ | +/-              | +++/>+++ |
| CD24                           | +/+      | -/-              | +/+      |
| S100A4                         | +++/>+++ | -/-              | +++/>+++ |
| <b>Matrix proteins</b>         |          |                  |          |
| Coll I                         | +++/>+++ | +++/>+++         | nt/nt    |
| Coll II                        | +++/>+++ | +++/>+++         | nt/nt    |
| Coll III                       | +/+      | +/+              | nt/nt    |
| Coll IV                        | +++/>+++ | +++/>+++         | nt/nt    |
| FN                             | +++/>+++ | +++/>+++         | ±/±      |
| Galectin 3                     | +++/>+++ | +++/>+++         | nt/nt    |
| HA                             | +++/>+++ | +++/>+++         | nt/nt    |
| LN1                            | +++/>+++ | +++/>+++         | nt/nt    |
| LN5                            | +++/>+++ | +++/>+++         | +/+      |
| Tenascin                       | +++/>+++ | +++/>+++         | nt/nt    |
| VN                             | +++/>+++ | +++/>+++         | nt/nt    |
| <b>Adhesion molecules</b>      |          |                  |          |
| CD11a                          | +/+      | ±/±              | +/+      |
| CD11b                          | +/+      | -/-              | +/+      |
| CD11c                          | +/+      | -/-              | +/+      |
| CD18                           | +/+      | ±/±              | +/+      |
| CD29                           | +++/>+++ | +/+              | +++/>+++ |
| CD49b                          | +/+      | -/-              | +/+      |
| CD49c                          | ±/±      | -/-              | +++/>+++ |
| CD49d                          | ±/±      | -/-              | ±/±      |
| CD49e                          | +/+      | ±/±              | +/+      |
| CD49f                          | +++/>+++ | -/-              | +++/>+++ |
| CD61                           | ±/±      | -/-              | nt/nt    |
| CD104                          | +++/>+++ | +/-              | +++/>+++ |
| <b>Enzymes and receptors</b>   |          |                  |          |
| uPA                            | +++/>+++ | nt/nt            | nt/nt    |
| uPAR                           | +++/>+++ | +++/>+++         | +++/>+++ |
| MMP2                           | +++/>+++ | +/+              | +++/>+++ |
| MMP9                           | +/+      | +/+              | ±/±      |
| MMP13                          | +/+      | -/-              | +/+      |
| CD13                           | +++/>+++ | +++/>+++         | +++/>+++ |
| HAS3                           | +++/>+++ | +++/>+++         | -/-      |
| PGK-1                          | +++/>+++ | +/+              | +++/>+++ |
| <b>Tetraspanins</b>            |          |                  |          |
| CD9                            | +++/>+++ | +++/>+++         | +++/>+++ |
| CD81                           | +++/>+++ | -/-              | +++/>+++ |
| CD151                          | +++/>+++ | +++/>+++         | +++/>+++ |
| D6.1A                          | +++/>+++ | -/-              | +++/>+++ |
| <b>Cytokines and receptors</b> |          |                  |          |
| HGF                            | +++/>+++ | -/-              | +++/>+++ |
| PDGF                           | +/+      | nt/nt            | nt/nt    |
| SDF-1                          | +/+      | +/+              | nt/nt    |
| VEGF                           | +/+      | +/+              | nt/nt    |
| OPN                            | +/+      | -/-              | -/-      |
| TSP                            | +++/>+++ | ±/±              | +++/>+++ |
| c-Met                          | +++/>+++ | +++/>+++         | -/-      |
| VEGFR1                         | +/+      | nt/nt            | nt/nt    |
| VEGFR2                         | +/+      | nt/nt            | nt/nt    |
| <b>Others</b>                  |          |                  |          |
| C3                             | +++/>+++ | +++/>+++         | +++/>+++ |
| Annexin II                     | +++/>+++ | -/-              | +++/>+++ |
| Annexin V                      | +++/>+++ | -/-              | +++/>+++ |
| HSP-1                          | +++/>+++ | -/-              | +++/>+++ |
| Caveolin                       | +++/>+++ | -/-              | +++/>+++ |
| EWI-F                          | +++/>+++ | ±/±              | +++/>+++ |
| INS-2                          | +++/>+++ | +/+              | +++/>+++ |
| Claudin-7                      | +++/>+++ | -/-              | +++/>+++ |

Coll indicates collagen; *kd*, knock down; *wt*, wild type; --, negative; ±, weak; +, distinct; ++, strong; +++, very strong; *nt*, not tested.

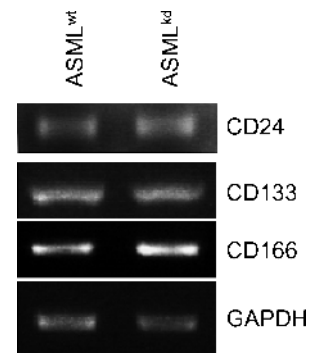

**Figure W2.** CIC marker expression in ASML<sup>wt</sup> and ASML<sup>kd</sup> cells. Expression of the CIC markers CD24, CD133, and CD166 in ASML<sup>wt</sup> and ASML<sup>kd</sup> cells was evaluated by reverse transcription-polymerase chain reaction. These markers are expressed by both ASML<sup>wt</sup> and ASML<sup>kd</sup> cells.

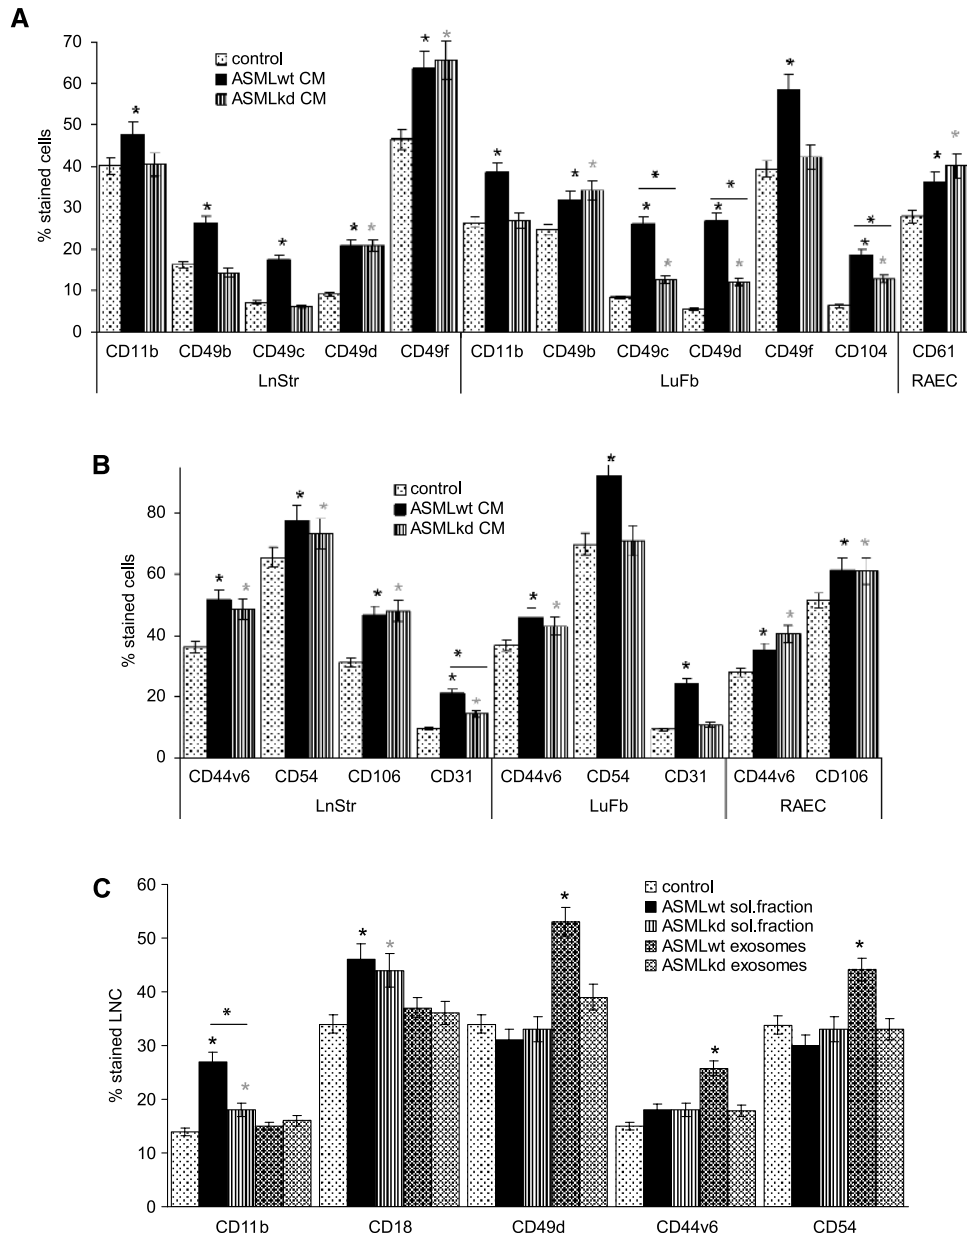

**Figure W3.** Modulated gene expression by ASML<sup>wt</sup>-conditioned medium. (A, B, D, E, and F) LnStr, LuFb, and RAEC were cultured for 48 hours in the presence of ASML<sup>wt</sup>- and ASML<sup>kd</sup>-CM. (C) LNC and (G) LnStr, LuFb, and RAEC were cultured for 48 hours in the presence of ASML<sup>wt</sup>- and ASML<sup>kd</sup>-soluble fraction or exosomes. Cells were harvested, and the expression of (A–C) adhesion molecules and (D and E) cytokines/chemokines and receptors and (F and G) matrix degrading enzymes was evaluated by flow cytometry. Mean values  $\pm$  SD of three experiments are shown. Significant differences in comparison the control medium are indicated by  $\star$ ; significant differences between ASML<sup>wt</sup>- versus ASML<sup>kd</sup>-CM and fractions thereof are indicated by  $\ast$ .

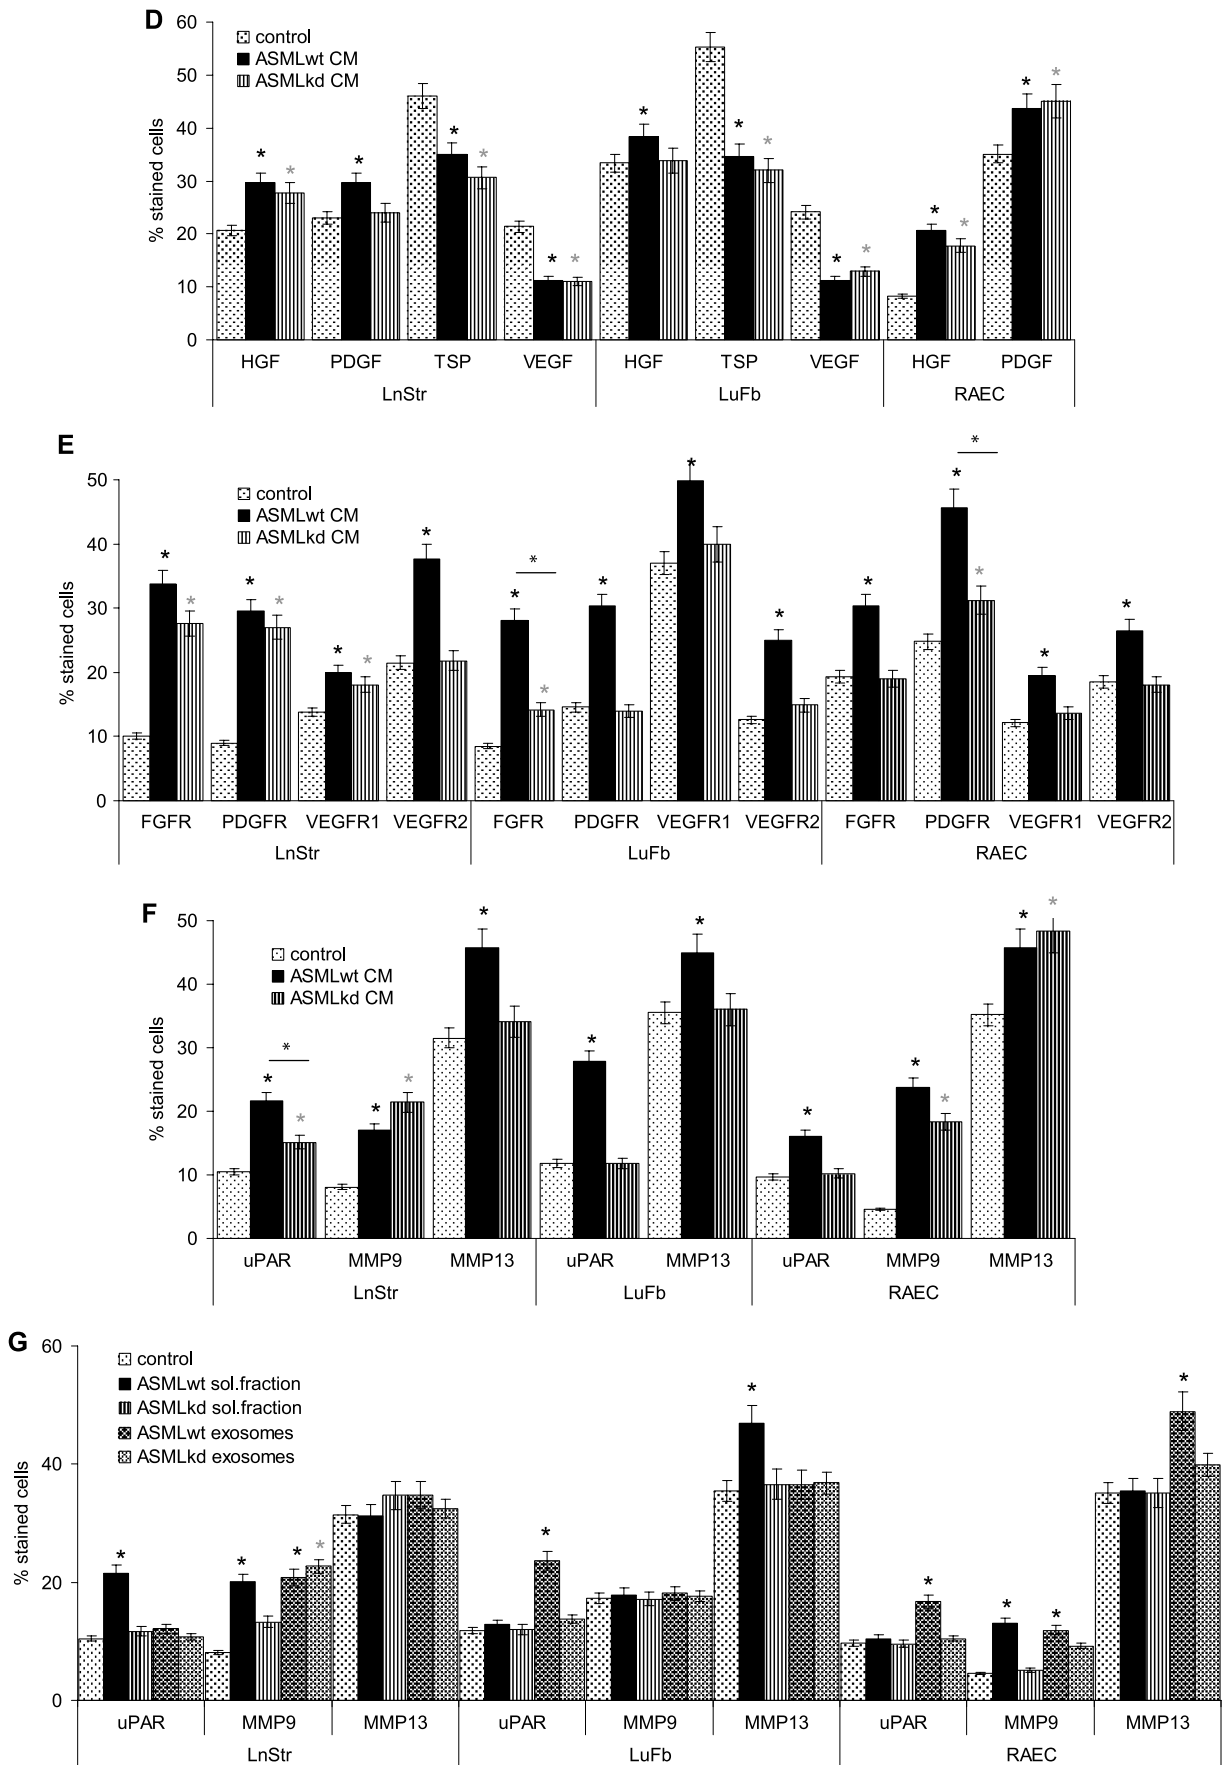

Figure W3. (continued).
